# Supplementary material
Source: HighWire-hosted journal article supplement (https://bjsm.bmj.com/content/54/19/1136)
Supplement: inline-supplementary-material-2 [file inline-supplementary-material-2.pdf]

## Daily Medical Report of Injury and Illness During a Golf Tournament

Country:

Date of report:

Form completed by: Name:

Contact details:

Please report: (1) All golf injuries and (2) all illnesses of your athletes newly incurred, recurrent or an exacerbation of an underlying stable injury/illness during the <name of the championship> regardless of the consequences with respect to absence from competition or training. The information provided will be treated strictly confidential.

### 1. Injury – Example

Definitions and codes (see reverse)

|                                             |                                |                            |                                                         |                                              |                              |                 |                              |                         |
|---------------------------------------------|--------------------------------|----------------------------|---------------------------------------------------------|----------------------------------------------|------------------------------|-----------------|------------------------------|-------------------------|
| age<br>22                                   | gender<br><i>male / female</i> | date of injury<br>21. July |                                                         | competition / training<br><i>competition</i> | code<br>1                    | onset code<br>1 | new code<br>4                |                         |
| injury mechanism<br><i>slipped and fell</i> |                                | code<br>5                  | injured body region, side<br><i>ankle, leading side</i> | code<br>17                                   | injury type<br><i>sprain</i> | code<br>10      | time-loss<br><i>no / yes</i> | duration<br>28 days     |
| age                                         | gender<br><i>male / female</i> | date of injury             |                                                         | competition / training                       | code                         | onset code      | new code                     |                         |
| injury mechanism                            |                                | code                       | injured body region, side                               | code                                         | injury type                  | code            | time-loss<br><i>no / yes</i> | duration<br><i>days</i> |
| age                                         | gender<br><i>male / female</i> | date of injury             |                                                         | competition / training                       | code                         | onset code      | new code                     |                         |
| injury mechanism                            |                                | code                       | injured body region, side                               | code                                         | injury type                  | code            | time-loss<br><i>no / yes</i> | duration<br><i>days</i> |
| age                                         | gender<br><i>male / female</i> | date of injury             |                                                         | competition / training                       | code                         | onset code      | new code                     |                         |
| injury mechanism                            |                                | code                       | injured body region, side                               | code                                         | injury type                  | code            | time-loss<br><i>no / yes</i> | duration<br><i>days</i> |
| age                                         | gender<br><i>male / female</i> | date of injury, side       |                                                         | competition / training                       | code                         | onset code      | new code                     |                         |
| injury mechanism                            |                                | code                       | injured body region                                     | code                                         | injury type                  | code            | time-loss<br><i>no / yes</i> | duration<br><i>days</i> |

### 2. Illness – Example

Definitions and codes (see reverse)

|                                                          |                                |                                        |                 |                                                    |                              |                         |
|----------------------------------------------------------|--------------------------------|----------------------------------------|-----------------|----------------------------------------------------|------------------------------|-------------------------|
| age<br>27                                                | gender<br><i>male / female</i> | date of onset<br>24 <sup>th</sup> July | onset code<br>2 | organ system / region<br><i>respiratory system</i> |                              | code<br>13              |
| aetiology<br><i>Environmental - not exercise related</i> |                                |                                        | code<br>3       | new, recurrent or exacerbation code<br>1           | time-loss<br><i>no / yes</i> | duration<br>2 days      |
| age                                                      | gender<br><i>male / female</i> | date of onset                          | onset code      | organ system / region                              |                              | code                    |
| aetiology                                                |                                |                                        | code            | new, recurrent or exacerbation code                | time-loss<br><i>no / yes</i> | duration<br><i>days</i> |
| age                                                      | gender<br><i>male / female</i> | date of onset                          | onset code      | organ system / region                              |                              | code                    |
| aetiology                                                |                                |                                        | code            | new, recurrent or exacerbation code                | time-loss<br><i>no / yes</i> | duration<br><i>days</i> |
| age                                                      | gender<br><i>male / female</i> | date of onset                          | onset code      | organ system / region                              |                              | code                    |
| aetiology                                                |                                |                                        | code            | new, recurrent or exacerbation code                | time-loss<br><i>no / yes</i> | duration<br><i>days</i> |
| age                                                      | gender<br><i>male / female</i> | date of onset                          | onset code      | organ system / region                              |                              | code                    |
| aetiology                                                |                                |                                        | code            | new, recurrent or exacerbation code                | time-loss<br><i>no / yes</i> | duration<br><i>days</i> |

If space is not sufficient to report all injuries or illnesses, please use additional forms.

no new injury or illness in any athlete of our team today

## Definitions and codes

**For injuries** (defined as tissue damage or other derangement of normal physical function due to participation in golf training, practice or competition, resulting from rapid or repetitive transfer of kinetic energy)

### Competition or training

|                                    |                                      |                             |
|------------------------------------|--------------------------------------|-----------------------------|
| 1 golf competition                 | 4 putting/ short game                | 7 warm-up, cool-down etc.   |
| 2 golf course (excl. competitions) | 5 fitness training for golf          | 8 gradual                   |
| 3 driving range                    | 6 other training activities for golf | 9 unknown, or not specified |

### Mode of onset

|                             |                              |           |         |
|-----------------------------|------------------------------|-----------|---------|
| 1 sudden after acute trauma | 2 sudden but no acute trauma | 3 gradual | 4 mixed |
|-----------------------------|------------------------------|-----------|---------|

### Injury mechanism

|                                |                                          |                                   |
|--------------------------------|------------------------------------------|-----------------------------------|
| 1 no identifiable single event | 3 direct contact with an object          | 5 indirect contact with an object |
| 2 acute non-contact trauma     | 4 direct contact with ground (e.g. fall) | 6 indirect contact with ground    |

### Injured body region and if applicable side (lead or trail)

|                                    |             |                                |
|------------------------------------|-------------|--------------------------------|
| 1 head                             | 7 shoulder  | 13 hip / groin                 |
| 2 neck / cervical spine            | 8 upper arm | 14 thigh                       |
| 3 chest (incl. chest organs)       | 9 elbow     | 15 knee                        |
| 4 thoracic spine / upper back      | 10 forearm  | 16 lower leg / Achilles tendon |
| 5 lumbar-sacral spine / buttock    | 11 wrist    | 17 ankle                       |
| 6 abdomen (incl. abdominal organs) | 12 hand     | 18 foot                        |

**L= Lead side:** left in right-handed golfers, right in left-handed; **T= Trail side:** right in right-handed golfer, left in left-handed

### Injury type

|                             |                                   |                                     |
|-----------------------------|-----------------------------------|-------------------------------------|
| 1 concussion / brain injury | 10 joint sprain / ligament tear   | 19 contusion / bruise (superficial) |
| 2 spinal cord injury        | 11 chronic instability            | 20 arthritis                        |
| 3 peripheral nerve injury   | 12 tendon rupture                 | 21 bursitis                         |
| 4 bone fracture             | 13 tendinopathy                   | 22 synovitis                        |
| 5 bone stress injury        | 14 muscle strain / rupture / tear | 23 vascular damage                  |
| 6 bone contusion            | 15 muscle contusion               | 24 stump injury                     |
| 7 avascular necrosis        | 16 muscle compartment syndrome    | 25 internal organ trauma            |
| 8 physis injury             | 17 laceration                     | 26 unknown, or not specified        |
| 9 cartilage injury          | 18 abrasion                       |                                     |

**For illnesses** (defined as a complaint or disorder not related to injury)

### Mode of onset

|          |           |         |
|----------|-----------|---------|
| 1 sudden | 2 gradual | 3 mixed |
|----------|-----------|---------|

### Organ system

|                    |                     |                              |
|--------------------|---------------------|------------------------------|
| 1 cardiovascular   | 6 genitourinary     | 11 otological                |
| 2 dermatological   | 7 hematologic       | 12 psychiatric/psychological |
| 3 dental           | 8 musculoskeletal   | 13 respiratory system        |
| 4 endocrinology    | 9 neurological      | 14 thermoregulatory system   |
| 5 gastrointestinal | 10 ophthalmological | 15 unknown, or not specified |

### Aetiology

|                                    |                           |                                     |
|------------------------------------|---------------------------|-------------------------------------|
| 1 allergic                         | 5 infection               | 9 degenerative or chronic condition |
| 2 environmental - exercise-related | 6 neoplasm                | 10 developmental anomaly            |
| 3 environmental - non-exercise     | 7 metabolic/nutritional   | 11 drug-related/poisoning           |
| 4 immunological/inflammatory       | 8 thrombotic/haemorrhagic | 12 unknown, or not specified        |

## For injuries and illnesses

### New, recurrent or exacerbation

|                                                    |                                                      |
|----------------------------------------------------|------------------------------------------------------|
| 1 newly incurred during the tournament             | 3 exacerbation of a stable (not recovered) condition |
| 2 recurrent after full recovery and return-to-golf | 4 unknown, or not specified                          |

### Time-loss in golf due to injury or illness

**no** athlete continues to train or compete, even if not at usual level (duration, intensity, performance)  
**yes** athlete *did not finish* the training or competition when the problem occurred *OR* could not participate in golf later

### Duration of impaired participation/ limited performance in golf due to injury or illness (in days)

Please provide an estimate of the number of days that the athlete will not be able to undertake his/her *normal training* or will not be able to *compete as usual*, counting the day *after* the onset of the injury/illness as day 1.

If an athlete is **not** expected to return to golf after the injury or illness, please state the reason: F=fatality, P=permanent disability, OR=reasons.
