# Supplementary material
Source: HighWire-hosted journal article supplement (https://bjsm.bmj.com/content/54/19/1136)
Supplement: inline-supplementary-material-3 [file inline-supplementary-material-3.pdf]

**In-Season Medical Report for Golf Injuries or Illnesses****Date of report:** \_\_\_\_\_**Team:** \_\_\_\_\_**Athlete identification:** \_\_\_\_\_**Date of onset:** \_\_\_\_\_

**For injury** defined as tissue damage or other derangement of normal physical function due to participation in golf training, practice or competition, resulting from rapid or repetitive transfer of kinetic energy

**Competition or training**

- |                                                           |                                                             |                                                    |
|-----------------------------------------------------------|-------------------------------------------------------------|----------------------------------------------------|
| <input type="checkbox"/> golf competition                 | <input type="checkbox"/> putting/ short game                | <input type="checkbox"/> warm-up, cool-down etc.   |
| <input type="checkbox"/> golf course (excl. competitions) | <input type="checkbox"/> fitness training for golf          | <input type="checkbox"/> gradual                   |
| <input type="checkbox"/> driving range                    | <input type="checkbox"/> other training activities for golf | <input type="checkbox"/> unknown, or not specified |

**Mode of onset**

- |                                                    |                                                     |                                  |                                |
|----------------------------------------------------|-----------------------------------------------------|----------------------------------|--------------------------------|
| <input type="checkbox"/> sudden after acute trauma | <input type="checkbox"/> sudden but no acute trauma | <input type="checkbox"/> gradual | <input type="checkbox"/> mixed |
|----------------------------------------------------|-----------------------------------------------------|----------------------------------|--------------------------------|

**Injury mechanism**

- |                                                       |                                                        |                                                          |
|-------------------------------------------------------|--------------------------------------------------------|----------------------------------------------------------|
| <input type="checkbox"/> no identifiable single event | <input type="checkbox"/> direct contact with an object | <input type="checkbox"/> indirect contact with an object |
| <input type="checkbox"/> non-contact trauma           | <input type="checkbox"/> direct contact with ground    | <input type="checkbox"/> indirect contact with ground    |

**Injured body region / side**

- ☐
- head
- 
- ☐
- neck / cervical spine
- 
- ☐
- chest (incl. chest organs)
- 
- ☐
- thoracic spine / upper back
- 
- ☐
- lumbar-sacral spine / buttock
- 
- ☐
- abdomen (incl. abdominal organs)

**right / left**

- ☐
- ☐
- shoulder
- 
- ☐
- ☐
- upper arm
- 
- ☐
- ☐
- elbow
- 
- ☐
- ☐
- forearm
- 
- ☐
- ☐
- wrist
- 
- ☐
- ☐
- hand

**right / left**

- ☐
- ☐
- hip / groin
- 
- ☐
- ☐
- thigh
- 
- ☐
- ☐
- knee
- 
- ☐
- ☐
- lower leg / Achilles tendon
- 
- ☐
- ☐
- ankle
- 
- ☐
- ☐
- foot

**Injury type**

- |                                                    |                                                         |                                                           |
|----------------------------------------------------|---------------------------------------------------------|-----------------------------------------------------------|
| <input type="checkbox"/> concussion / brain injury | <input type="checkbox"/> joint sprain / ligament tear   | <input type="checkbox"/> contusion / bruise (superficial) |
| <input type="checkbox"/> spinal cord injury        | <input type="checkbox"/> chronic instability            | <input type="checkbox"/> arthritis                        |
| <input type="checkbox"/> peripheral nerve injury   | <input type="checkbox"/> tendon rupture                 | <input type="checkbox"/> bursitis                         |
| <input type="checkbox"/> bone fracture             | <input type="checkbox"/> tendinopathy                   | <input type="checkbox"/> synovitis                        |
| <input type="checkbox"/> bone stress injury        | <input type="checkbox"/> muscle strain / rupture / tear | <input type="checkbox"/> vascular damage                  |
| <input type="checkbox"/> bone contusion            | <input type="checkbox"/> muscle contusion               | <input type="checkbox"/> stump injury                     |
| <input type="checkbox"/> avascular necrosis        | <input type="checkbox"/> muscle compartment syndrome    | <input type="checkbox"/> internal organ trauma            |
| <input type="checkbox"/> physis injury             | <input type="checkbox"/> laceration                     | <input type="checkbox"/> unknown, or not specified        |
| <input type="checkbox"/> cartilage injury          | <input type="checkbox"/> abrasion                       |                                                           |

**For illness** defined as a complaint or disorder not related to injury

**Mode of onset**

- |                                 |                                  |                                |
|---------------------------------|----------------------------------|--------------------------------|
| <input type="checkbox"/> sudden | <input type="checkbox"/> gradual | <input type="checkbox"/> mixed |
|---------------------------------|----------------------------------|--------------------------------|

**Organ system**

- |                                           |                                           |                                                      |
|-------------------------------------------|-------------------------------------------|------------------------------------------------------|
| <input type="checkbox"/> cardiovascular   | <input type="checkbox"/> genitourinary    | <input type="checkbox"/> otological                  |
| <input type="checkbox"/> dermatological   | <input type="checkbox"/> hematologic      | <input type="checkbox"/> psychiatric / psychological |
| <input type="checkbox"/> dental           | <input type="checkbox"/> musculoskeletal  | <input type="checkbox"/> respiratory system          |
| <input type="checkbox"/> endocrinology    | <input type="checkbox"/> neurological     | <input type="checkbox"/> thermoregulatory system     |
| <input type="checkbox"/> gastrointestinal | <input type="checkbox"/> ophthalmological | <input type="checkbox"/> unknown, or not specified   |

**Aetiology**

- |                                                           |                                                  |                                                            |
|-----------------------------------------------------------|--------------------------------------------------|------------------------------------------------------------|
| <input type="checkbox"/> allergic                         | <input type="checkbox"/> infectious disease      | <input type="checkbox"/> degenerative or chronic condition |
| <input type="checkbox"/> environmental - exercise-related | <input type="checkbox"/> neoplasm                | <input type="checkbox"/> developmental anomaly             |
| <input type="checkbox"/> environmental - non-exercise     | <input type="checkbox"/> metabolic / nutritional | <input type="checkbox"/> drug-related / poisoning          |
| <input type="checkbox"/> immunological / inflammatory     | <input type="checkbox"/> vascular                | <input type="checkbox"/> unknown, or not specified         |

**For injury and illness****New, recurrent or exacerbation**

- |                              |                                                                             |                                                    |
|------------------------------|-----------------------------------------------------------------------------|----------------------------------------------------|
| <input type="checkbox"/> new | <input type="checkbox"/> recurrent after full recovery and return-to-golf   | <input type="checkbox"/> unknown, or not specified |
|                              | <input type="checkbox"/> exacerbation of a stable (not recovered) condition |                                                    |

**Time-loss in golf due to injury / illness**

- ☐
- no
- ☐
- yes

**Date of full return to normal training and competition** \_\_\_\_\_ (dd/mm/yy)

**No return to golf possible:** ☐ fatality      ☐ permanent disability      ☐ other reasons \_\_\_\_\_
