# Supplementary material
Source: HighWire-hosted journal article supplement (https://bjsm.bmj.com/content/54/19/1136)
Supplement: inline-supplementary-material-5 [file inline-supplementary-material-5.pdf]

## Weekly Self-Report of Health Complaints and Exposure to Golf

**Note:** Users can change the questionnaire title to suit the aims and context of the study. Epidemiological studies that collect information directly from athletes are likely to use electronic questionnaires. This document can be used to creating an electronic questionnaire with logic (i.e. athletes' path through the questionnaire is determined by their answers). All questions should have single select answers, except otherwise noted. Questionnaire logic and other notes are written in **red** and **blue**. Electronic questionnaires with logic should not present red and blue text to athletes. For paper-based questionnaires red notes should be deleted but blue notes kept to guide the athlete through the questionnaire.

### Athlete identification:

### Date of report:

Please answer all questions regardless of whether you have experienced health problems in the past 7 days. Select the alternative that is most appropriate for you, and in the case that you are unsure, try to answer as best you can anyway.

A health problem is any condition that you consider to be a reduction in your normal state of full health, irrespective of its consequences on your golf participation or performance, or whether you have sought medical attention. This may include, but is not limited to, injury, illness, pain or mental health conditions.

If you have several health problems, please begin with your worst problem in the past 7 days, **and then fill in another questionnaire for each other problems.**

1. Have you had any difficulties **participating in training, practice or competition** due to injury, illness or other health problems during the past 7 days?

- ☐ full participation without health problems (**please continue with question 22**)
- ☐ full participation, but with a health problem
- ☐ reduced participation due to a health problem
- ☐ could not participate due to a health problem (**please continue with question 4**)

2. To what extent have you **modified your training, practice or competition** due to injury, illness or other health problems during the past 7 days?

- ☐ no modification
- ☐ to a minor extent
- ☐ to a moderate extent
- ☐ to a major extent

3. To what extent has injury, illness or other health problems **affected your performance** during the past 7 days?

- ☐ no effect
- ☐ to a minor extent
- ☐ to a moderate extent
- ☐ to a major extent

4. To what extent have you **experienced symptoms/health complaints** during the past 7 days?

- ☐ no symptoms/health complaints
- ☐ to a minor extent
- ☐ to a moderate extent
- ☐ to a severe extent

5. **When** did this health problem occur or when did you **first** notice **symptoms**?

*If this is a recurrent problem, please refer to the most recent episode.*

\_\_\_\_\_ dd/mm/yy *(Enter date or select from calendar.)*

6. Have you **reported** this health problem **previously**?

☐ no

☐ yes *(Athlete chooses from a list of previously reported problems and continues with question 17.)*

7. Is your health problem an **injury** or an **illness**?

☐ **injury** defined as tissue damage or other reduction of normal physical function, resulting from rapid or repetitive transfer of kinetic energy

☐ **illness** defined as complaint or disorder not related to injury. Illnesses include health-related problems in physical (e.g. influenza), mental (e.g. depression) or social well-being, or removal or loss of vital elements (air, water, warmth) *(please continue with question 16)*

8. What **body part** was/is injured?

*(Body part can be recorded using either the list below or a body chart.)*

☐ head

☐ shoulder

☐ hip / groin

☐ neck / cervical spine

☐ upper arm

☐ thigh

☐ chest / ribs (incl. chest organs)

☐ elbow

☐ knee

☐ upper back / thoracic spine

☐ forearm

☐ lower leg / Achilles tendon

☐ low back / lumbo-sacral spine / buttock

☐ wrist

☐ ankle

☐ abdomen (incl. abdominal organs)

☐ hand /finger / thumb

☐ foot

☐ others, please specify \_\_\_\_\_ *(Free text entry can be added here.)*

9. Which **body side** (except for head neck, chest, spine, abdomen) was/is injured?

*(If a body chart is used the injured body side should be recorded automatically.)*

☐ right

☐ left

☐ not applicable

10. Has a **qualified medical practitioner** provided a **diagnosis** for your injury?

☐ no *(please continue with question 12)*

☐ yes

11. What is the **type of your injury**?

☐ bone fracture

☐ contusion / bruise

☐ concussion / brain injury

☐ muscle strain / rupture / tear

☐ abrasion / laceration / cut

☐ nerve / spinal cord injury

☐ tendon rupture

☐ tendinosis / tendinopathy

☐ internal organ trauma

☐ joint sprain / ligament tear

☐ joint arthritis

☐ growth plate (physis) injury

☐ meniscus or cartilage injury

☐ bursitis/ synovitis

☐ dental injury

☐ others, please specify \_\_\_\_\_ *(Free text entry can be added here.)*

12. Did the injury occur **suddenly** or **gradually**?

☐ suddenly, i.e. in a single instant or over several seconds

☐ gradually *(please continue with question 14)*

**13. What were you doing when the injury occurred?**

- |                                                           |                                                                   |
|-----------------------------------------------------------|-------------------------------------------------------------------|
| <input type="checkbox"/> golf competition                 | <input type="checkbox"/> fitness training for golf                |
| <input type="checkbox"/> golf course (excl. competitions) | <input type="checkbox"/> warm-up or cool-down for golf or similar |
| <input type="checkbox"/> driving range                    | <input type="checkbox"/> other training activities for golf       |
| <input type="checkbox"/> putting / short game             | <input type="checkbox"/> not related to golf                      |
|                                                           | <input type="checkbox"/> unknown, or not specified                |

**14. Was the injury caused by a clearly identifiable, single event (e.g. a fall or a collision)?**

- ☐ yes
- ☐ no (*please continue with question 17*)

**15. How did the injury happen?**

- ☐ single event without contact (e.g. pain in the low back while making a swing without hitting anything other than the ball)
- ☐ direct contact with an object (e.g. hit by another players golf ball)
- ☐ direct contact ground (e.g. stumble and fall)
- ☐ indirect contact with an object (e.g. hitting tree root with club while hitting shot)
- ☐ indirect contact with ground (e.g. hitting the ground with club while taking shot/ divot)

*Please continue with question 17.*

**16. What kind of illness complaints or symptoms do/did you have?**

*(multiple selections possible)*

- |                                                         |                                                     |                                                           |
|---------------------------------------------------------|-----------------------------------------------------|-----------------------------------------------------------|
| <input type="checkbox"/> fever                          | <input type="checkbox"/> diarrhoea                  | <input type="checkbox"/> numbness/pins and needles        |
| <input type="checkbox"/> fatigue/malaise                | <input type="checkbox"/> constipation               | <input type="checkbox"/> anxiety                          |
| <input type="checkbox"/> swollen glands                 | <input type="checkbox"/> symptoms of hay fever      | <input type="checkbox"/> depression/sadness               |
| <input type="checkbox"/> sore throat                    | <input type="checkbox"/> muscle cramps              | <input type="checkbox"/> irritability                     |
| <input type="checkbox"/> blocked /running nose/sneezing | <input type="checkbox"/> fainting                   | <input type="checkbox"/> sleep problems                   |
| <input type="checkbox"/> cough                          | <input type="checkbox"/> rash/itchiness             | <input type="checkbox"/> eye symptoms                     |
| <input type="checkbox"/> breathing difficulty/tightness | <input type="checkbox"/> irregular pulse/arrhythmia | <input type="checkbox"/> ear symptoms                     |
| <input type="checkbox"/> headache                       | <input type="checkbox"/> chest pain/angina          | <input type="checkbox"/> urinary tract/genitalia symptoms |
| <input type="checkbox"/> nausea                         | <input type="checkbox"/> abdominal/menstrual pain   |                                                           |
| <input type="checkbox"/> vomiting                       | <input type="checkbox"/> Other pain                 |                                                           |
| <input type="checkbox"/> others, please specify _____   |                                                     | <i>(Free text entry can be added here.)</i>               |

**17. Have you seen a physician, physiotherapist, psychologist or another qualified medical practitioner because of this health problem in the past 7 days?**

- ☐ no ☐ yes, physician ☐ yes, other

**18. On how many of the past 7 days, would you have been completely unable to train, practice or compete due to this health problem?**

*Please consider all 7 days, even if no training, practice or competition was planned.*

\_\_\_\_\_ days of the past 7 days (*A number between 0 and 7 should be entered here.*)

**19. On how many of the past 7 days, did you have to modify or reduce your normal training, practice or competition due to this health problem?**

*Please consider all 7 days, even if no training, practice or competition was planned.*

\_\_\_\_\_ days of the past 7 days (*A number between 0 and 7 should be entered here.*)

20. Would you like to add any **additional information** about this problem that you think may be important?

---

*(Free text entry can be added here.)*

21. Have you had any **other health problems** during the past 7 days?

☐ no

☐ yes *(please describe your other health problems using another questionnaire)*

*(The electronic questionnaire loops back to question 1 as many times as is necessary to record all the athlete's health problems. In subsequent rounds, question 1 should begin with "Please refer your second-worst health problem" or third worst etc. depending on the loop.)*

*For optimal internal consistency, questions 22 and 23 should not be presented to athletes who reported complete inability to participate in question 1 and 7 days of time loss in question 18.*

22. Have you played a **golf competition** in the past 7 days?

☐ no

☐ yes, please state **how many competitive rounds** have you played in golf tournaments.

|                                            | <b>competitive rounds in golf tournaments</b><br>in the past 7 days |
|--------------------------------------------|---------------------------------------------------------------------|
| international                              |                                                                     |
| national                                   |                                                                     |
| regional                                   |                                                                     |
| within my golf club / college / university |                                                                     |

23. Have you played a **golf course**, or **practiced or trained for golf** in the past 7 days?

☐ no

☐ yes, please state on how many days **and** how many holes/balls/hours in total.

|                                  | <b>days</b> in the<br>past 7 days | <b>total</b><br>in the past 7 days        |
|----------------------------------|-----------------------------------|-------------------------------------------|
| golf course (excl. competitions) | days                              | _____ <b>holes</b> played<br><b>hours</b> |
| driving range                    | days                              | _____ <b>balls</b> hit<br><b>hours</b>    |
| putting / short game             | days                              | <b>hours</b>                              |
| fitness training for golf        | days                              | <b>hours</b>                              |
| others, please specify           | days                              | total <b>hours</b>                        |

**Thank you for taking the time to fill in the questionnaire!**
