# Supplementary material
Source: HighWire-hosted journal article supplement (https://bjsm.bmj.com/content/54/19/1136)
Supplement: inline-supplementary-material-6 [file inline-supplementary-material-6.pdf]

**The first questions relate to you.**

1. What is your **gender**?

- male                       female                       diverse

2. How **old** are you?

\_\_\_\_\_ years

3. In which **country** do you live and train?

\_\_\_\_\_

4. What is your **highest level of education or professional training**?

- no qualifications                       high school  
 primary school                       professional training / apprenticeship  
 secondary school                       college / university

5. What do you do **in your everyday life**? (Please tick all answers that apply)

- work, \_\_\_\_\_ hours per week                       military service  
 elite sport                       household with children or family members  
 school / university / college                       household without children or family members  
 vocational training                       hobbies  
 other, please specify \_\_\_\_\_

**The next questions relate to your sport.**

6. At what **age** did you **start playing** golf?

\_\_\_\_\_ years

7. Are you **right or left handed**?

- in general                       right handed                       left handed  
when I play golf                       right handed                       left handed

8. What is your **current golfing handicap**? \_\_\_\_\_

9. At which **level of golf** do you **currently compete**?

- elite (professional players competing on tour or amateurs competing in international/national amateur championships)  
 sub-elite (PGA teaching professionals, amateurs competing in regional/county/state tournaments or with handicap 5 or less)  
 recreational (handicap more than 5)  
 I have never participated in any golf competition (please to Q11)

Player-No. \_\_\_\_\_

10. How many **golf competitions** have you played **in the last 12 months**?

international \_\_\_\_\_  
 national \_\_\_\_\_  
 regional \_\_\_\_\_  
 within my golf club / college / university \_\_\_\_\_

11. How much have you **trained for golf** on average **in the last 12 months**?

Please state how many days **and** how many holes/balls/hours in total per week.

|                                  | days per week | total per week        |
|----------------------------------|---------------|-----------------------|
| golf course (excl. competitions) | days per week | holes played per week |
| driving range                    | days per week | balls hit per week    |
| putting/short game               | days per week | hours per week        |
| fitness training for golf        | days per week | hours per week        |
| others, please specify           | days per week | hours per week        |
|                                  | days per week | hours per week        |

12. Which of the following **activities** do you include in your **physical fitness training for golf**?

- I don't practise a specific fitness training for golf  
 heavy load low volume resistance training (e.g. 3x3 back squats at 85%)  
 low load/high volume resistance training (e.g. 3x10-15 lunges)  
 weighted explosive training (e.g. weighted jump squats/medicine ball throws)  
 body weight explosive work (e.g. box jumps/explosive press ups)  
 resistance band exercises (e.g. crab walks)  
 aerobic exercise (e.g. running/cycling/swimming)  
 proprioception (e.g. balance/coordination)  
 mobility (range of motion exercise/stretching)  
 others, please specify \_\_\_\_\_

13. Are you currently working on a **technical change in your golf swing**?

- no  yes

14. How often do you **practise on golf mats**?

- never  rarely  sometimes  often  always

15. Are you doing any specific **injury prevention** exercises or programmes?

- no  yes, please specify for which body parts
- |                                   |                                   |                                |
|-----------------------------------|-----------------------------------|--------------------------------|
| <input type="checkbox"/> neck     | <input type="checkbox"/> shoulder | <input type="checkbox"/> hip   |
| <input type="checkbox"/> mid back | <input type="checkbox"/> elbow    | <input type="checkbox"/> thigh |
| <input type="checkbox"/> low back | <input type="checkbox"/> wrist    | <input type="checkbox"/> knee  |
|                                   |                                   | <input type="checkbox"/> ankle |

16. How often do you warm up before the following activities?

|                                   | never                    | rarely                   | sometimes                | often                    | always                   |
|-----------------------------------|--------------------------|--------------------------|--------------------------|--------------------------|--------------------------|
| playing golf                      | <input type="checkbox"/> |
| driving range, putting/short game | <input type="checkbox"/> |
| fitness training                  | <input type="checkbox"/> |

Player-No. \_\_\_\_\_

17. Which kind of exercises do you include in your **golf warm-up**?

- I never warm-up  
 working through the clubs/pre-round golf practice  
 explosive or strength exercises (e.g. weighted squats/jump squats)  
 bodyweight resistance exercises (e.g. squats)  
 resistance band exercises (e.g. crab walks)  
 aerobic exercise (e.g. running/cycling/swimming)  
 proprioception (e.g. balance/coordination)  
 mobility (range of motion exercise/stretching)

18. Which **other** type(s) of **sports** do you practise on a **regular** basis?

- no other sport than golf  
 general fitness training (e.g. gym)  
 jogging  
 biking  
 soccer  
 tennis  
 ski / snowboarding  
 other, please specify \_\_\_\_\_

19. How often and many hours per week did you **practice the other sport(s)** on average **in the last 12 months**?

- regularly, \_\_\_\_\_ times per week, in total \_\_\_\_\_ hours per week  
 irregularly, on average \_\_\_\_\_ times per week, in total between \_\_\_\_\_ and \_\_\_\_\_ hours per week

The following questions refer to your **current complaints**.

20. Do you **currently** have **complaints, illnesses or injuries** that prevent you **training or playing golf as usual**?

- no       yes      What is the **diagnosis**? \_\_\_\_\_

**How long** have you had these complaints? \_\_\_\_\_ days / \_\_\_\_\_ weeks

**How long overall** do you think you will be unable to carry out your daily activities in everyday life and/or at work as usual or to **train and play golf as usual** due to these problems?

\_\_\_\_\_ days / \_\_\_\_\_ weeks

21. Overall, how severe were your **pain / complaints in the last 7 days**?

- no pain/complaints       mild       moderate       severe       very severe

Player-No. \_\_\_\_\_

22. How severe have your **pains / complaints** in the following body regions been **in the last 7 days** in **everyday life** and during / after **training or playing golf**?

(0= no complaints to 10= worst imaginable complaints)

|                                          | no |   |   |   |   |   |   |   |   |   | worst imaginable |
|------------------------------------------|----|---|---|---|---|---|---|---|---|---|------------------|
| <b>headache</b>                          |    |   |   |   |   |   |   |   |   |   |                  |
| in everyday life                         | 0  | 1 | 2 | 3 | 4 | 5 | 6 | 7 | 8 | 9 | 10               |
| training or playing golf                 | 0  | 1 | 2 | 3 | 4 | 5 | 6 | 7 | 8 | 9 | 10               |
| <b>neck (cervical)</b>                   |    |   |   |   |   |   |   |   |   |   |                  |
| in everyday life                         | 0  | 1 | 2 | 3 | 4 | 5 | 6 | 7 | 8 | 9 | 10               |
| training or playing golf                 | 0  | 1 | 2 | 3 | 4 | 5 | 6 | 7 | 8 | 9 | 10               |
| <b>upper back (thoracic)</b>             |    |   |   |   |   |   |   |   |   |   |                  |
| in everyday life                         | 0  | 1 | 2 | 3 | 4 | 5 | 6 | 7 | 8 | 9 | 10               |
| training or playing golf                 | 0  | 1 | 2 | 3 | 4 | 5 | 6 | 7 | 8 | 9 | 10               |
| <b>lower back (lumbar)</b>               |    |   |   |   |   |   |   |   |   |   |                  |
| in everyday life                         | 0  | 1 | 2 | 3 | 4 | 5 | 6 | 7 | 8 | 9 | 10               |
| training or playing golf                 | 0  | 1 | 2 | 3 | 4 | 5 | 6 | 7 | 8 | 9 | 10               |
| <b>right shoulder</b>                    |    |   |   |   |   |   |   |   |   |   |                  |
| in everyday life                         | 0  | 1 | 2 | 3 | 4 | 5 | 6 | 7 | 8 | 9 | 10               |
| training or playing golf                 | 0  | 1 | 2 | 3 | 4 | 5 | 6 | 7 | 8 | 9 | 10               |
| <b>left shoulder</b>                     |    |   |   |   |   |   |   |   |   |   |                  |
| in everyday life                         | 0  | 1 | 2 | 3 | 4 | 5 | 6 | 7 | 8 | 9 | 10               |
| training or playing golf                 | 0  | 1 | 2 | 3 | 4 | 5 | 6 | 7 | 8 | 9 | 10               |
| <b>right elbow</b>                       |    |   |   |   |   |   |   |   |   |   |                  |
| in everyday life                         | 0  | 1 | 2 | 3 | 4 | 5 | 6 | 7 | 8 | 9 | 10               |
| training or playing golf                 | 0  | 1 | 2 | 3 | 4 | 5 | 6 | 7 | 8 | 9 | 10               |
| <b>left elbow</b>                        |    |   |   |   |   |   |   |   |   |   |                  |
| in everyday life                         | 0  | 1 | 2 | 3 | 4 | 5 | 6 | 7 | 8 | 9 | 10               |
| training or playing golf                 | 0  | 1 | 2 | 3 | 4 | 5 | 6 | 7 | 8 | 9 | 10               |
| <b>right hand / wrist</b>                |    |   |   |   |   |   |   |   |   |   |                  |
| in everyday life                         | 0  | 1 | 2 | 3 | 4 | 5 | 6 | 7 | 8 | 9 | 10               |
| training or playing golf                 | 0  | 1 | 2 | 3 | 4 | 5 | 6 | 7 | 8 | 9 | 10               |
| <b>left hand / wrist</b>                 |    |   |   |   |   |   |   |   |   |   |                  |
| in everyday life                         | 0  | 1 | 2 | 3 | 4 | 5 | 6 | 7 | 8 | 9 | 10               |
| training or playing golf                 | 0  | 1 | 2 | 3 | 4 | 5 | 6 | 7 | 8 | 9 | 10               |
| <b>right knee</b>                        |    |   |   |   |   |   |   |   |   |   |                  |
| in everyday life                         | 0  | 1 | 2 | 3 | 4 | 5 | 6 | 7 | 8 | 9 | 10               |
| training or playing golf                 | 0  | 1 | 2 | 3 | 4 | 5 | 6 | 7 | 8 | 9 | 10               |
| <b>left knee</b>                         |    |   |   |   |   |   |   |   |   |   |                  |
| in everyday life                         | 0  | 1 | 2 | 3 | 4 | 5 | 6 | 7 | 8 | 9 | 10               |
| training or playing golf                 | 0  | 1 | 2 | 3 | 4 | 5 | 6 | 7 | 8 | 9 | 10               |
| <b>right hip</b>                         |    |   |   |   |   |   |   |   |   |   |                  |
| in everyday life                         | 0  | 1 | 2 | 3 | 4 | 5 | 6 | 7 | 8 | 9 | 10               |
| training or playing golf                 | 0  | 1 | 2 | 3 | 4 | 5 | 6 | 7 | 8 | 9 | 10               |
| <b>left hip</b>                          |    |   |   |   |   |   |   |   |   |   |                  |
| in everyday life                         | 0  | 1 | 2 | 3 | 4 | 5 | 6 | 7 | 8 | 9 | 10               |
| maxim training or playing golf           | 0  | 1 | 2 | 3 | 4 | 5 | 6 | 7 | 8 | 9 | 10               |
| <b>other</b> body parts,<br>which? _____ |    |   |   |   |   |   |   |   |   |   |                  |
| in everyday life                         | 0  | 1 | 2 | 3 | 4 | 5 | 6 | 7 | 8 | 9 | 10               |
| training or playing golf                 | 0  | 1 | 2 | 3 | 4 | 5 | 6 | 7 | 8 | 9 | 10               |

Player-No. \_\_\_\_\_

The last questions refer to your **medical history**.23. Please state your **body height** and **weight**: \_\_\_\_\_cm      \_\_\_\_\_kg24. Do you have any **disability**? no       yes, please specify \_\_\_\_\_25. Have you ever had an **injury** that **prevented** you training or playing **golf as usually** for more than four weeks? no yes, please indicate the date of injury, the diagnosis and how long you had complaints.

| when<br>(month / year) | diagnosis | duration of complaints<br>(in days) |
|------------------------|-----------|-------------------------------------|
|                        |           |                                     |
|                        |           |                                     |
|                        |           |                                     |
|                        |           |                                     |
|                        |           |                                     |
|                        |           |                                     |

26. Do you have **recurring complaints** that prevent you from training or playing golf **as usual**? no yes, please specify how often, type of complaints, and average duration of complaints

| how often | type of complaints | duration<br>(in days) |
|-----------|--------------------|-----------------------|
|           |                    |                       |
|           |                    |                       |
|           |                    |                       |
|           |                    |                       |
|           |                    |                       |
|           |                    |                       |

Player-No. \_\_\_\_\_

27. Have you ever been **diagnosed** with and/or treated for **arthrosis / osteoarthritis**?

- no                       yes, please specify for which body parts
- |                              |                                |                               |
|------------------------------|--------------------------------|-------------------------------|
| hip                          | <input type="checkbox"/> right | <input type="checkbox"/> left |
| knee                         | <input type="checkbox"/> right | <input type="checkbox"/> left |
| ankle                        | <input type="checkbox"/> right | <input type="checkbox"/> left |
| foot                         | <input type="checkbox"/> right | <input type="checkbox"/> left |
| shoulder                     | <input type="checkbox"/> right | <input type="checkbox"/> left |
| elbow                        | <input type="checkbox"/> right | <input type="checkbox"/> left |
| wrist                        | <input type="checkbox"/> right | <input type="checkbox"/> left |
| hand/finger joints           | <input type="checkbox"/> right | <input type="checkbox"/> left |
| lumbar spine                 | <input type="checkbox"/>       |                               |
| thoracic spine               | <input type="checkbox"/>       |                               |
| cervical spine (neck)        | <input type="checkbox"/>       |                               |
| others, please specify _____ |                                |                               |

28. Have you ever been **diagnosed** with and/or treated for the following **illnesses** or complaints?

|                                         | no                       | yes, previously          | yes, currently           |
|-----------------------------------------|--------------------------|--------------------------|--------------------------|
| rheumatism                              | <input type="checkbox"/> | <input type="checkbox"/> | <input type="checkbox"/> |
| diabetes                                | <input type="checkbox"/> | <input type="checkbox"/> | <input type="checkbox"/> |
| high blood pressure                     | <input type="checkbox"/> | <input type="checkbox"/> | <input type="checkbox"/> |
| sleep disturbance                       | <input type="checkbox"/> | <input type="checkbox"/> | <input type="checkbox"/> |
| depression, anxiety, burnout or similar | <input type="checkbox"/> | <input type="checkbox"/> | <input type="checkbox"/> |
| others, please specify _____            | <input type="checkbox"/> | <input type="checkbox"/> | <input type="checkbox"/> |
| _____                                   | <input type="checkbox"/> | <input type="checkbox"/> | <input type="checkbox"/> |

29. Have you ever had any **surgery** upon your musculo-skeletal system (incl. bones, joints, muscles, tendon, facia)?

- no                       cervical spine                       elbow                       knee
- thoracic spine                       hand                       ankle
- lumbar spine                       wrist                       foot
- shoulder                       hip                       others, please specify \_\_\_\_\_

Please provide **details** on all operations upon your musculo-skeletal system.

| when<br>(month / year) | diagnosis / type of operation | duration until full<br>recovery (in days) |
|------------------------|-------------------------------|-------------------------------------------|
|                        |                               |                                           |
|                        |                               |                                           |
|                        |                               |                                           |
|                        |                               |                                           |
|                        |                               |                                           |
|                        |                               |                                           |
|                        |                               |                                           |
|                        |                               |                                           |

Player-No. \_\_\_\_\_

30. How often have you taken the following **medications in the last 12 months**?

|                                            | (almost) daily           | 2-3 times per week       | 2-4 times per month      | ≤ 1x per months          | never                    |
|--------------------------------------------|--------------------------|--------------------------|--------------------------|--------------------------|--------------------------|
| pain killers (e.g. Aspirin, Ibuprofen)     | <input type="checkbox"/> |
| cortisone (pills / injections)             | <input type="checkbox"/> |
| medication for stress, anxiety, depression | <input type="checkbox"/> |
| other medication, please specify           | <input type="checkbox"/> |
|                                            | <input type="checkbox"/> |

31. On average, how many hours do you **sleep** per night?

≤6 hours       7 hours       8 hours       9 hours       >9 hours

32. Have there been any **special events** during the past 12 months that have altered your life or that have affected you (such as relocation, marriage, death, or illness among your close family or friends, separation, difficulties / problems in the club / team)?

no

yes, please specify \_\_\_\_\_

33. Would you like to **add anything** to the questionnaire?

\_\_\_\_\_

**Thank you for completing the questionnaire!**
